# Supplementary material for: SLC1A5 co-expression with TALDO1 associates with endocrine therapy failure in estrogen receptor-positive breast cancer
Source: PubMed Central journal article supplement (PMC8357718; doi:10.1007/s10549-021-06298-1), 2021-07-19
Supplement: 10549_2021_6298_MOESM1_ESM.pdf [file 10549_2021_6298_MOESM1_ESM.pdf]

## **SLC1A5 co-expression with TALDO1 associates with endocrine therapy failure in oestrogen receptor-positive breast cancer**

Lutfi H. Alfarsi,<sup>1</sup> Rokaya El Ansari<sup>1</sup>, Madeleine L. Craze<sup>1</sup>, Omar J. Mohammed<sup>1</sup>, Brendah K. Masisi<sup>1</sup>, Ian O. Ellis<sup>1,2</sup>, Emad A. Rakha<sup>1,2</sup> and Andrew R. Green<sup>1\*</sup>

<sup>1</sup> Nottingham Breast Cancer Research Centre, Division of Cancer and Stem Cells, School of Medicine, University of Nottingham, University of Nottingham Biodiscovery Institute, University Park, Nottingham NG7 2RD;

<sup>2</sup> Cellular Pathology, Nottingham University Hospitals NHS Trust, Nottingham City Hospital, Hucknall Road, Nottingham NG5 1PB.

### **Correspondence:**

Dr. Andrew R. Green. Nottingham Breast Cancer Research Centre, Division of Cancer and Stem Cells, School of Medicine, University of Nottingham Biodiscovery Institute, University Park, Nottingham NG7 2RD

Tel: (44) 115 8231407

Email: [andrew.green@nottingham.ac.uk](mailto:andrew.green@nottingham.ac.uk)

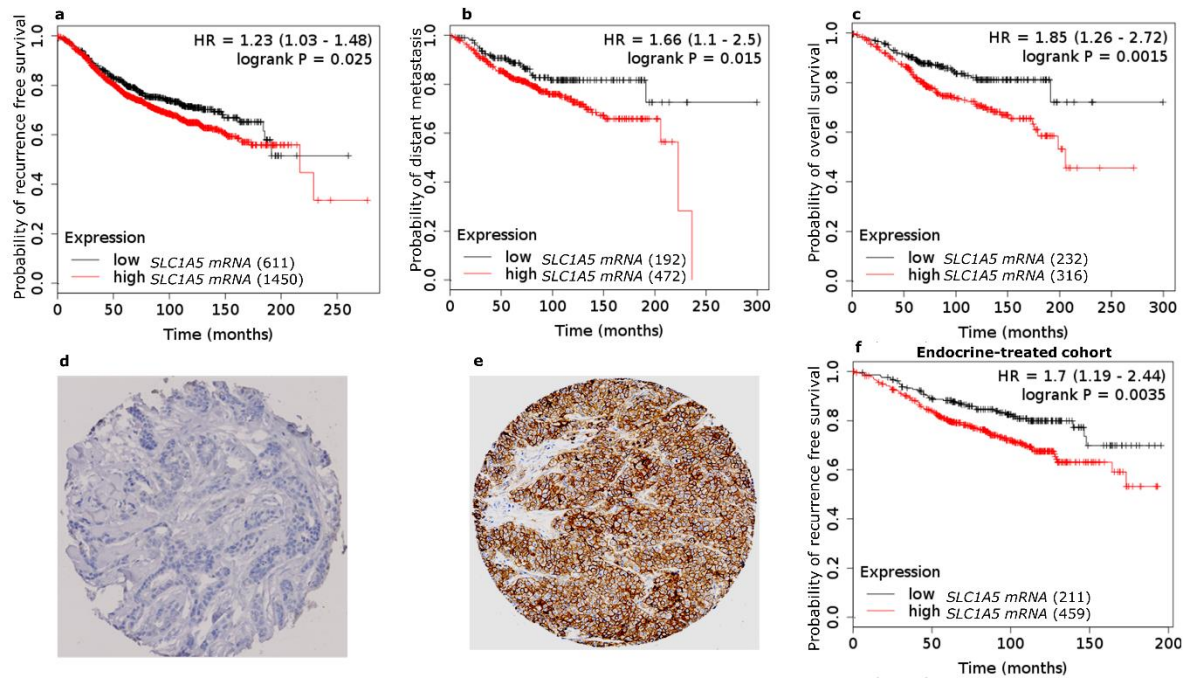

**Supplementary figure 1:** Kaplan–Meier of *SLC1A5* mRNA and patient outcome in luminal breast cancer using KM-Plotter for **a)** recurrence free survival **b)** distant metastasis and **c)** overall survival. Representative immunostaining images of invasive breast cancer cores using IHC **d)** Negative and **e)** positive for *SLC1A5* protein expression. Kaplan-Meier of *SLC1A5* mRNA expression in patients with luminal breast cancer who received endocrine treatment only using KM-Plotter dataset **f)** recurrence free survival.

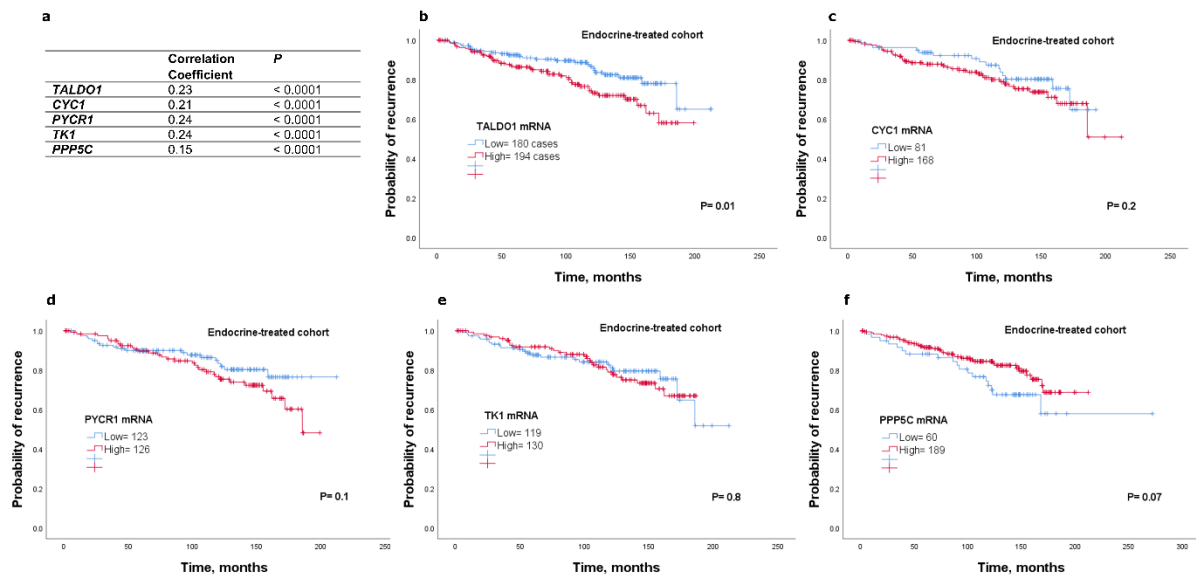

**Supplementary figure 2:** a) shows correlation of *TALDO1*, *CYC1*, *PYCR1*, *TK1* and *PPP5C* with *SLC1A5* mRNA expression using bc-GenExMiner v4.3. Kaplan-Meier analysis and recurrence in patients with luminal breast cancer who received endocrine treatment only using METABRIC cohort for **b) TALDO1** **c) CYC1** **d) PYCR1** **e) TK1** and **f) PPP5C**.

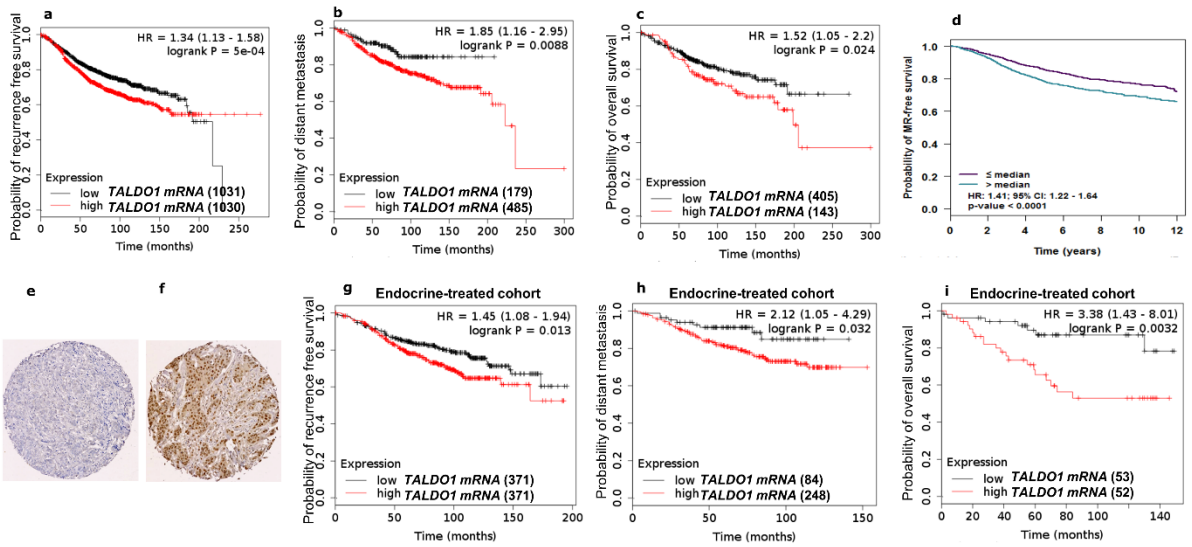

**Supplementary figure 3:** Kaplan–Meier of *TALDO1* mRNA and patient outcome in luminal breast cancer using KM-Plotter dataset for **a**) recurrence free survival **b**) distant metastasis and **c**) overall survival, while **d**) Kaplan–Meier using bc-GenExMiner v4.3 for *TALDO1* mRNA and survival. Representative immunostaining images of invasive breast cancer cores using IHC **e**) Negative and **f**) Positive for *TALDO1* protein expression. Kaplan–Meier of *TALDO1* mRNA expression in patients with luminal breast cancer who received endocrine treatment only using KM-Plotter **g**) recurrence free survival **h**) distant metastasis and **i**) overall survival.

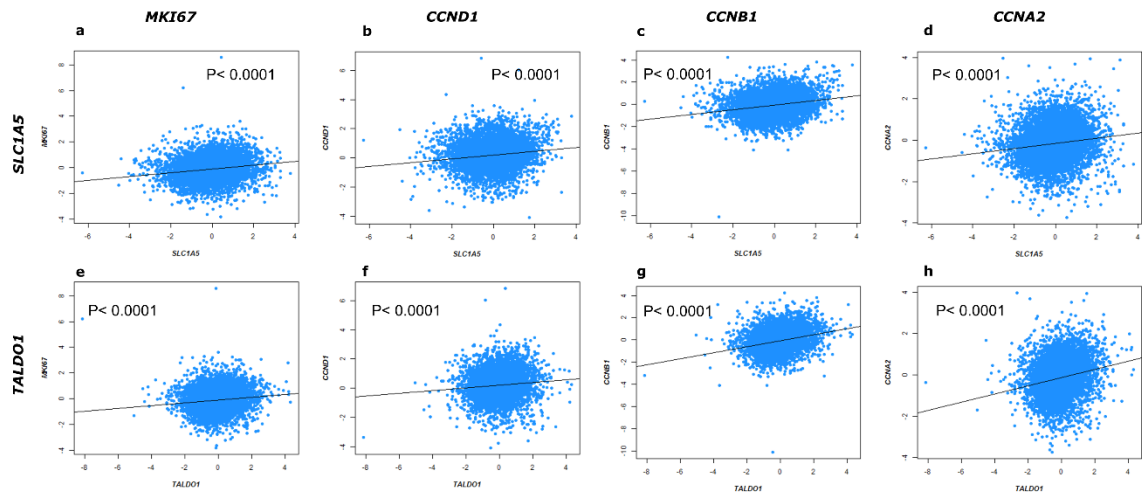

**Supplementary figure 4:** *SLC1A5* mRNA correlation with proliferation associated-genes including **a) MKI67** **b) CCND1** **c) CCNB1** and **d) CCNA2**, and *TALDO1* mRNA correlation with **e) MKI67** **f) CCND1** **g) CCNB1** and **h) CCNA2** using bc-GenExMiner v4.3 dataset.

**Supplementary table 1:** Clinicopathological characteristics of luminal breast cancer cohorts.

| Parameters                         | METABRIC cohort | Nottingham cohort |
|------------------------------------|-----------------|-------------------|
|                                    | <i>mRNA</i>     | Protein           |
|                                    | No. (%)         | No. (%)           |
| <b>Age</b>                         |                 |                   |
| <50                                | 228 (15)        | 449 (31)          |
| ≥50                                | 1278 (85)       | 1006 (69)         |
| <b>Tumour size (cm)</b>            |                 |                   |
| <2 cm                              | 475 (31.5)      | 806 (55.7)        |
| ≥2 cm                              | 1031 (68.5)     | 640 (44.3)        |
| <b>Tumour grade</b>                |                 |                   |
| 1                                  | 166 (11.5)      | 388 (24.7)        |
| 2                                  | 707 (49.1)      | 661 (42.1)        |
| 3                                  | 565 (38.4)      | 522 (33.2)        |
| <b>Nottingham Prognostic Index</b> |                 |                   |
| GPG                                | 623 (41.3)      | 598 (41.4)        |
| MPG                                | 772 (51.2)      | 668 (46.1)        |
| PPG                                | 111 (7.5)       | 180 (12.5)        |
| <b>Nodal stage</b>                 |                 |                   |
| 1                                  | 404 (36.2)      | 1025 (65.1)       |
| 2                                  | 634 (56.8)      | 439 (27.9)        |
| 3                                  | 78 (7)          | 111 (7)           |
| <b>Vascular invasion</b>           |                 |                   |
| negative                           | N/A             | 1000 (69)         |
| positive                           |                 | 439 (31)          |
| <b>Endocrine therapy alone</b>     |                 |                   |
| No                                 | 234 (15.5)      | 810 (50)          |
| Yes                                | 384 (25.5)      | 554 (35)          |
| Other*                             | 888 (59)        | 237 (15)          |
| <b>Recurrence</b>                  |                 |                   |
| No                                 | 496 (33)        | 953 (60)          |
| Yes                                | 118 (7)         | 618 (38)          |
| Unknown                            | 892 (60)        | 30 (2)            |
| <b>Distant metastasis</b>          |                 |                   |
| No                                 | 476 (31)        | 1079 (67)         |
| Yes                                | 143 (10)        | 514 (32)          |
| Unknown                            | 887 (59)        | 8 (1)             |
| <b>Progesterone receptor</b>       |                 |                   |
| Negative                           | 486 (23.2)      | 300 (21.3)        |
| Positive                           | 1020 (76.8)     | 1103 (78.7)       |

**GPG:** Good prognostic group; **MPG:** Moderate prognostic group; **PPG:** Poor prognostic group

**\*:** Include patients who received chemotherapy alone or combination of chemotherapy and endocrine therapy.

**Supplementary table 2:** Multivariate cox analysis of associations between SLC1A5 protein expression and clinicopathological parameters using Nottingham cohort.

| <b>Luminal breast cancer cohort</b> |                                         |          |           |
|-------------------------------------|-----------------------------------------|----------|-----------|
|                                     | <b>Distant metastasis free survival</b> |          |           |
|                                     | HR (95% CI)                             | <i>P</i> | <i>P*</i> |
| SLC1A5                              | 1.2 (1.0-1.5)                           | 0.028    | 0.03      |
| Tumor size                          | 1.5 (1.2-1.8)                           | 0.00005  | 0.0001    |
| Tumor grade                         | 1.5 (1.3-1.8)                           | 1.7e-10  | < 0.0001  |
| Nodal stage                         | 1.8 (1.5-2.1)                           | 7.9e-17  | < 0.0001  |
|                                     | <b>Breast cancer specific survival</b>  |          |           |
|                                     | HR (95% CI)                             | <i>P</i> | <i>P*</i> |
| SLC1A5                              | 1.3 (1.0-1.6)                           | 0.01     | 0.012     |
| Tumor size                          | 1.4 (1.1-1.8)                           | 0.0003   | 0.0005    |
| Tumor grade                         | 1.6 (1.4-1.9)                           | 2.2e-11  | < 0.0001  |
| Nodal stage                         | 1.6 (1.4-1.8)                           | 1.7e-10  | < 0.0001  |
| <b>Endocrine-treated cohort</b>     |                                         |          |           |
|                                     | <b>Breast cancer specific survival</b>  |          |           |
|                                     | HR (95% CI)                             | <i>P</i> | <i>P*</i> |
| SLC1A5                              | 1.4 (1.0-1.9)                           | 0.029    | 0.03      |
| Tumor size                          | 1.4 (1.0-2.0)                           | 0.026    | 0.04      |
| Tumor grade                         | 2.2 (1.6-3.1)                           | 1.5e-7   | < 0.0001  |
| Nodal stage                         | 1.9 (1.5-2.4)                           | 1.3e-7   | < 0.0001  |

*P\**: Adjusted p-value

**Supplementary table 3:** Multivariate cox analysis of associations between TALDO1 protein expression and clinicopathological parameters using Nottingham cohort.

| <b>Luminal breast cancer cohort</b> |                                         |          |           |
|-------------------------------------|-----------------------------------------|----------|-----------|
|                                     | <b>Recurrence free survival</b>         |          |           |
|                                     | HR (95% CI)                             | <i>P</i> | <i>P*</i> |
| TALDO1                              | 1.5 (1.1-2.1)                           | 0.006    | 0.01      |
| Tumor size                          | 1.5 (1.0-2.1)                           | 0.013    | 0.02      |
| Tumor grade                         | 1.2 (1.0-1.6)                           | 0.033    | 0.04      |
| Nodal stage                         | 1.5 (1.2-1.9)                           | 0.0002   | 0.001     |
|                                     | <b>Distant metastasis free survival</b> |          |           |
|                                     | HR (95% CI)                             | <i>P</i> | <i>P*</i> |
| TALDO1                              | 1.5 (1.1-2.1)                           | 0.009    | 0.01      |
| Tumor size                          | 2.0 (1.4-2.9)                           | 0.00003  | 0.0002    |
| Tumor grade                         | 1.3 (1.0-1.7)                           | 0.01     | 0.012     |
| Nodal stage                         | 1.5 (1.2-2.0)                           | 0.0001   | 0.0003    |
|                                     | <b>Breast cancer specific survival</b>  |          |           |
|                                     | HR (95% CI)                             | <i>P</i> | <i>P*</i> |
| TALDO1                              | 1.8 (1.2-2.5)                           | 0.001    | 0.0013    |
| Tumor size                          | 2.0 (1.3-3.0)                           | 0.00042  | 0.001     |
| Tumor grade                         | 1.6 (1.2-2.2)                           | 0.00046  | 0.008     |
| Nodal stage                         | 1.7 (1.3-2.3)                           | 0.00001  | 0.0001    |
| <b>Endocrine-treated cohort</b>     |                                         |          |           |
|                                     | <b>Recurrence free survival</b>         |          |           |
|                                     | HR (95% CI)                             | <i>P</i> | <i>P*</i> |
| TALDO1                              | 2.2 (1.3-3.6)                           | 0.001    | 0.002     |
| Tumor size                          | 1.6 (1.0-2.7)                           | 0.03     | 0.05      |
| Tumor grade                         | 1.5 (0.9-2.2)                           | 0.05     | 0.06      |
| Nodal stage                         | 1.7 (1.2-2.3)                           | 0.001    | 0.005     |
|                                     | <b>Distant metastasis free survival</b> |          |           |
|                                     | HR (95% CI)                             | <i>P</i> | <i>P*</i> |
| TALDO1                              | 2.3 (1.4-3.9)                           | 0.001    | 0.002     |
| Tumor size                          | 1.9 (1.1-3.3)                           | 0.01     | 0.015     |
| Tumor grade                         | 1.7 (1.1-2.7)                           | 0.012    | 0.016     |
| Nodal stage                         | 1.7 (1.2-2.3)                           | 0.001    | 0.005     |
|                                     | <b>Breast cancer specific survival</b>  |          |           |
|                                     | HR (95% CI)                             | <i>P</i> | <i>P*</i> |
| TALDO1                              | 2.4 (1.4-4.1)                           | 0.001    | 0.002     |
| Tumor size                          | 2.0 (1.1-3.5)                           | 0.013    | 0.016     |
| Tumor grade                         | 2.2 (1.3-3.6)                           | 0.001    | 0.002     |
| Nodal stage                         | 1.7 (1.2-2.4)                           | 0.002    | 0.005     |
| <i>P*</i> : Adjusted p-value        |                                         |          |           |



**Supplementary table 4:** Multivariate cox analysis of associations between SLC1A5/TALDO1 protein co-expression and clinicopathological parameters using Nottingham cohort.

| <b>Luminal breast cancer cohort</b> |                                         |          |           |
|-------------------------------------|-----------------------------------------|----------|-----------|
|                                     | <b>Recurrence free survival</b>         |          |           |
|                                     | HR (95% CI)                             | <i>P</i> | <i>P*</i> |
| SLC1A5+TALDO1+ vs SLC1A5-TALDO1-    | 1.5 (1.0-2.4)                           | 0.03     | 0.05      |
| Tumor size                          | 1.5 (1.1-2.1)                           | 0.008    | 0.02      |
| Tumor grade                         | 1.2 (1.0-1.6)                           | 0.04     | 0.05      |
| Nodal stage                         | 1.5 (1.1-1.9)                           | 0.001    | 0.005     |
|                                     | <b>Distant metastasis free survival</b> |          |           |
|                                     | HR (95% CI)                             | <i>P</i> | <i>P*</i> |
| SLC1A5+TALDO1+ vs SLC1A5-TALDO1-    | 1.7 (1.0-2.7)                           | 0.02     | 0.025     |
| Tumor size                          | 2.1 (1.5-3.1)                           | 0.00002  | 0.0001    |
| Tumor grade                         | 1.3 (1.0-1.7)                           | 0.01     | 0.016     |
| Nodal stage                         | 1.5 (1.2-1.9)                           | 0.0003   | 0.0008    |
|                                     | <b>Breast cancer specific survival</b>  |          |           |
|                                     | HR (95% CI)                             | <i>P</i> | <i>P*</i> |
| SLC1A5+TALDO1+ vs SLC1A5-TALDO1-    | 2.1 (1.2-3.6)                           | 0.005    | 0.006     |
| Tumor size                          | 2.0 (1.3-3.0)                           | 0.0004   | 0.001     |
| Tumor grade                         | 1.6 (1.2-2.2)                           | 0.002    | 0.003     |
| Nodal stage                         | 1.7 (1.3-2.2)                           | 0.00004  | 0.0002    |
| <b>Endocrine-treated cohort</b>     |                                         |          |           |
|                                     | <b>Recurrence free survival</b>         |          |           |
|                                     | HR (95% CI)                             | <i>P</i> | <i>P*</i> |
| SLC1A5+TALDO1+ vs SLC1A5-TALDO1-    | 2.5 (1.3-4.7)                           | 0.005    | 0.01      |
| Tumor size                          | 1.6 (1.0-2.7)                           | 0.04     | 0.06      |
| Tumor grade                         | 1.4 (0.9-2.1)                           | 0.1      | 0.12      |
| Nodal stage                         | 1.6 (1.1-2.3)                           | 0.003    | 0.01      |
|                                     | <b>Distant metastasis free survival</b> |          |           |
|                                     | HR (95% CI)                             | <i>P</i> | <i>P*</i> |
| SLC1A5+TALDO1+ vs SLC1A5-TALDO1-    | 2.5 (1.3-4.9)                           | 0.006    | 0.01      |
| Tumor size                          | 1.9 (1.1-3.2)                           | 0.01     | 0.016     |
| Tumor grade                         | 1.6 (1.0-2.6)                           | 0.03     | 0.037     |
| Nodal stage                         | 1.6 (1.1-2.3)                           | 0.004    | 0.02      |
|                                     | <b>Breast cancer specific survival</b>  |          |           |
|                                     | HR (95% CI)                             | <i>P</i> | <i>P*</i> |
| SLC1A5+TALDO1+ vs SLC1A5-TALDO1-    | 2.6 (1.3-5.4)                           | 0.007    | 0.01      |
| Tumor size                          | 1.9 (1.1-3.3)                           | 0.02     | 0.025     |
| Tumor grade                         | 2.0 (1.2-3.4)                           | 0.005    | 0.01      |
| Nodal stage                         | 1.6 (1.1-2.4)                           | 0.005    | 0.02      |

*P\**: Adjusted p-value

**Supplementary table 5:** Correlation of *SLC1A5* and *TALDO1* mRNA expression with the proliferation related-genes in luminal breast cancer using METABRIC cohort.

|                                     | <b><i>SLC1A5</i> mRNA</b> |          |            |
|-------------------------------------|---------------------------|----------|------------|
|                                     | Correlation Coefficient   | <i>P</i> | <i>P</i> * |
| <b><i>MKI67</i></b>                 | 0.21                      | 7.89e-18 | < 0.0001   |
| <b><i>CCNB1</i></b>                 | 0.25                      | 6.21e-24 | < 0.0001   |
| <b><i>CCNA2</i></b>                 | 0.19                      | 1.01e-13 | < 0.0001   |
| <b><i>CCND1</i></b>                 | 0.17                      | 6.80e-12 | < 0.0001   |
|                                     | <b><i>TALDO1</i> mRNA</b> |          |            |
|                                     | Correlation Coefficient   | <i>P</i> | <i>P</i> * |
| <b><i>MKI67</i></b>                 | 0.12                      | 5.93e-7  | < 0.0001   |
| <b><i>CCNB1</i></b>                 | 0.08                      | 0.002    | 0.0027     |
| <b><i>CCNA2</i></b>                 | 0.33                      | 1.91e-40 | < 0.0001   |
| <b><i>CCND1</i></b>                 | -0.004                    | 0.89     | 3.56       |
| <b><i>P</i>*</b> : Adjusted p-value |                           |          |            |
